# Supplementary material for: Fruit-Derived Anthocyanins: Effects on Cycling-Induced Responses and Cycling Performance
Source: MDPI journal article supplement (doi:10.3390/antiox11020387), 2022-02-15
Supplement: s1 [file s1]

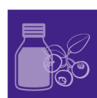

**Table S1.** Effects of fruit-derived anthocyanins on cycling-induced responses and cycling performance. Captions: ACN, anthocyanins; ALT, altitude; ATi, anaerobic threshold intensity; CK, creatine kinase; CM, cardiometabolic markers; CO, cardiac output; CRP, C-reactive protein; DNA, deoxyribonucleic acid; DBP, diastolic blood pressure; F, females; FATMAX, intensity eliciting maximal fat oxidation rate, conveyed as percentage of maximal oxygen uptake (%VO<sub>2max</sub>); GSH, reduced glutathione; Hct, hematocrit; HDL, high density lipoprotein; HIIE, high-intensity intermittent exercise; HIIT, high-intensity interval training; HR, heart rate; hsCRP, high-sensitivity C-reactive protein; I, inflammation biomarkers; IL-1-β, interleukin-1-beta; IL-6, interleukin-6; IL-8, interleukin-8; [La-]b, blood lactate concentration; LDL, low density lipoprotein; LOOH, lipid hydroperoxides; M, males; MAP, mean arterial pressure; MD, multiple daily; MDA, malondialdehyde; MO, muscle oxygenation; MVIC, maximum voluntary isometric contraction; NEFA, non-esterified fatty acids; NO, nitric oxide biomarkers; NO<sub>2</sub><sup>-</sup>, nitrite; NO<sub>3</sub><sup>-</sup>, nitrate; OS, oxidative stress biomarkers; OSI, oxidative stress index; O<sub>2</sub>, oxygen; P, performance; RER, respiratory exchange ratio; RPE, ratings of perceived exertion; rPPOspint, relative peak power output sprint; SBP, systolic blood pressure; SD, single daily; SEA, sea level; SV, stroke volume; SO, substrate oxidation; TAS, total antioxidant status; TEAC, trolox equivalent antioxidant capacity; TNF-α, tumor necrosis factor-alpha; TOI, tissue oxygenation index; TPR, total peripheral resistance; TTE, trial to exhaustion; VCO<sub>2</sub>, carbon dioxide produced; VE, minute ventilation; VF, vascular function; VO<sub>2</sub>, oxygen uptake; VO<sub>2max</sub>, maximal oxygen consumption; VT2, ventilatory threshold 2; ↑ increase; ↓ decrease; → maintenance/no significant differences when compared to the control group.

| References                                          | Sample                                                                    | Supplementation Protocol/Duration | Fruit and Processing Method   | Intervention Strategy/Total Daily Anthocyanin Amount | Cycling Protocol/Duration                                                                                              | Blood Collection Time Points                                                                                                                                                                                                                                            | Key Findings                                                                                                                                                |
|-----------------------------------------------------|---------------------------------------------------------------------------|-----------------------------------|-------------------------------|------------------------------------------------------|------------------------------------------------------------------------------------------------------------------------|-------------------------------------------------------------------------------------------------------------------------------------------------------------------------------------------------------------------------------------------------------------------------|-------------------------------------------------------------------------------------------------------------------------------------------------------------|
| Bell et al. (2014) [8]—United Kingdom               | 16 M, trained<br>VO <sub>2max</sub> = 61.6 ± 10.4 mL.kg. min              | 7 days                            | Cherry, juice concentrate     | MD: 2x – 30 mL + 100 mL of water<br>547 mg ACN       | High-intensity cycling intervals, 109 min                                                                              | Baseline (prior to 4-day loading phase), pre- and post-trial 1, pre- and post-trial 2, and pre- and post-trial 3                                                                                                                                                        | <b>OS:</b> ↓ LOOH<br><b>I:</b> ↓ IL-6 and hsCRP → IL-8, IL-1-β, and TNF-α<br><b>Muscle Damage:</b> → CK                                                     |
| Bell et al. (2015) [17]—United Kingdom              | 16 M, trained<br>VO <sub>2max</sub> = 61.6 ± 10.4 mL.kg. min              | 8 days                            | Cherry, juice concentrate     | MD: 2x – 30 mL + 100 mL of water<br>552 mg ACN       | High-intensity cycling intervals, 109 min                                                                              | Baseline (prior to 4 the day loading phase), immediately pre-trial, immediately post-trial, and 1, 3, 5, 24, 48, and 72 h post-trial                                                                                                                                    | <b>OS:</b> → LOOH<br><b>I:</b> ↓ IL-6 and hsCRP, → IL-8 and TNF-α<br><b>Muscle Damage:</b> → CK<br><b>P:</b> MVIC decline attenuation and ↓ VO <sub>2</sub> |
| Cliford; Mitchell; Scott (2013) [40]—United Kingdom | 9 M, recreationally trained<br>VO <sub>2max</sub> = 52.4 ± 8.7 mL.kg. min | 3 days                            | Cherry, powdered freeze-dried | SD: 1 capsule<br>Not reported                        | Four 5 min stages with maximum power output of 40%, 50%, 60%, and 70% (W max), followed by a 20 km time trial, ~53 min | Before the end of each stage                                                                                                                                                                                                                                            | <b>P:</b> → Lactate and time trial                                                                                                                          |
| Cook et al. (2015) [23]—United Kingdom              | 14 M, recreationally trained<br>VO <sub>2max</sub> = 53.0 ± 6.0 mL.kg.min | 7 days                            | Blackcurrant, extract         | SD: 1 capsule<br>105 mg ACN                          | 30 min of cycling (3 × 10 min at 45, 55 and 65% of VO <sub>2max</sub> ), followed by a 16.1 km time trial, ~ 58 min    | Between each exercise stage of incremental cycling test, 4 min after the end of the of incremental cycling test, 5 min into each stage (i.e., at 5, 15, 25 min of submaximal cycling intensities), and every minute for the first 5 min, and then taken every 5 min for | <b>P:</b> ↑ Lactate<br>↓ Total time to complete the 16.1 km time trial<br><b>SO:</b> ↑ Fat oxidation → Carbohydrate oxidation                               |

|                                         |                                                                              |                         |                                 |                                                |                                                                                                                                                                                                                                                |                                                                                                                                                                                          |                                                                                                                                                                                                                                       |
|-----------------------------------------|------------------------------------------------------------------------------|-------------------------|---------------------------------|------------------------------------------------|------------------------------------------------------------------------------------------------------------------------------------------------------------------------------------------------------------------------------------------------|------------------------------------------------------------------------------------------------------------------------------------------------------------------------------------------|---------------------------------------------------------------------------------------------------------------------------------------------------------------------------------------------------------------------------------------|
|                                         |                                                                              |                         |                                 |                                                |                                                                                                                                                                                                                                                |                                                                                                                                                                                          | a total of 15 min after the 16.1 km cycling time trial                                                                                                                                                                                |
| Cook et al. (2017) [24]—United Kingdom  | 15 M, trained<br>VO <sub>2max</sub> = 56.7 ± 7.9 mL.kg.min                   | 7 days                  | Blackcurrant, extract           | SD: 1–3 capsules<br>105–315 mg ACN             | Four separate 120 min cycling bouts at 65% VO <sub>2max</sub> , 120 min                                                                                                                                                                        |                                                                                                                                                                                          | At the beginning of the rest stage of the incremental cycling test, 4 min after the end of the incremental cycling test and every 15 min (i.e., at 15, 30, 45, 60, 75, 90, 105, and 120 min) of the 120 cycling protocol              |
|                                         |                                                                              |                         |                                 |                                                |                                                                                                                                                                                                                                                |                                                                                                                                                                                          | <b>P:</b> → VO <sub>2</sub> , VCO <sub>2</sub> , and lactate<br><b>SO:</b> ↑ Fat oxidation → Carbohydrate oxidation                                                                                                                   |
| Copetti et al. (2020) [11]—Brazil       | 15 M, recreationally trained<br>** VO <sub>2max</sub> = 49.1 ± 7.2 mL.kg.min | 1 day—Prior to the test | Juçara fruit, juice concentrate | SD: 250 mL<br>185 mg ACN                       | HIIT: 7 series of high-intensity cycling lasting 60 s and a workload corresponding to 100% of the peak power obtained in the maximum incremental test with a 75 s active recovery interval (30 W), 17 min                                      | 1 h prior to exercise, immediately post-exercise, and 1 h post-exercise                                                                                                                  | <b>OS:</b> ↑ GSH<br>↓ OSI<br>↑ Total phenols and uric acid (over time)<br><b>Fatigue:</b> ↓ Fatigue index                                                                                                                             |
| Crum et al. (2017) [39]—United Kingdom  | 7 M, 1 F, professional<br>VO <sub>2max</sub> = 74.4 ± 6.2 mL.kg.min          | 1 day—Prior to the test | Pomegranate, extract            | SD: 1 capsule<br>18 mg ACN                     | Cycling TTE at 100% VO <sub>2max</sub> at sea level (SEA) and at 1657 m of altitude (ALT) ~10 min                                                                                                                                              | Before the test                                                                                                                                                                          | <b>NO:</b> ↑ NO <sub>3</sub> <sup>−</sup> → NO <sub>2</sub> <sup>−</sup><br><b>VF:</b> → SBP and DPB<br><b>P:</b> ↑ Hct and VO <sub>2</sub> at 1657 m of ALT<br>↓ Hct at SEA<br>→ TTE 100%, VCO <sub>2</sub> and [La <sup>−</sup> ]b  |
| Desai et al. (2018) [12]—United Kingdom | 7 M, 4 F, untrained<br>VO <sub>2max</sub> = 35.9 ± 4.8 mL.kg.min             | 20 days                 | Cherry, juice concentrate       | MD: 2x – 30 mL + 100 mL of water<br>540 mg ACN | 1 h of FATMAX exercise that consist in cycling on cycle ergometer at 70 rev.min <sup>−1</sup> at an initial intensity of 30 W with increments of 10 W every 3 min. The test was terminated once RER exceeded 1 for a continuous period of 30 s | Before and after exercise                                                                                                                                                                | <b>OS:</b> ↓ Pre-exercise TAS<br><b>CM:</b> ↓ HDL, → serum glucose, triglycerides, LDL, and HR<br><b>SO:</b> → mean fat and carbohydrate oxidation rates                                                                              |
| Keane et al. (2018) [28]—United Kingdom | 10 M, trained<br>VO <sub>2max</sub> = 59.0 ± 7.0 mL.kg.min                   | 1 day—Prior to the test | Cherry, juice concentrate       | SD: 60 mL + 100 mL of water<br>73 mg ACN       | 6 min of cycles of moderate and severe intensity. The severe intensity test was continued until exhaustion on one occasion and immediately                                                                                                     | Baseline, over the 20 s preceding the step transition in work rate, the 20 s preceding the completion of 360 s of moderate- and severe-intensity cycling exercise, immediately following | <b>P:</b> ↑ Peak power in the first 20 s and the total work completed during the total 60 s sprint<br>↑ Test peak power by 9.5% and the total work completed during the 60 s sprint by 10% between → TTE, VO <sub>2</sub> and lactate |

|                                                        |                                                                                  |                          |                                   |                                   |                                                                                                                                                                                                             |                                                                                                                      |                                                                                                                                                                                                                                                                                                                                                                                                                                     |
|--------------------------------------------------------|----------------------------------------------------------------------------------|--------------------------|-----------------------------------|-----------------------------------|-------------------------------------------------------------------------------------------------------------------------------------------------------------------------------------------------------------|----------------------------------------------------------------------------------------------------------------------|-------------------------------------------------------------------------------------------------------------------------------------------------------------------------------------------------------------------------------------------------------------------------------------------------------------------------------------------------------------------------------------------------------------------------------------|
|                                                        |                                                                                  |                          |                                   |                                   | followed by a to- tal sprint of 60 s                                                                                                                                                                        | the 60 s all-out sprint and immediately af- ter exhaustion dur- ing the severe-inten- sity constant-work- rate trial | <b>MO:</b> → TOI<br><b>NO:</b> → NO <sub>2</sub> <sup>-</sup> and NO <sub>3</sub> <sup>-</sup><br><b>VF:</b> ↓ SBP                                                                                                                                                                                                                                                                                                                  |
| Mendes et al. (2021) [18]—Brazil                       | 15 M, recre- ationally trained<br>** VO <sub>2max</sub> = 49.1 ± 7.2 mL. kg. min | 1 day— Prior to the test | Juçara fruit, juice concen- trate | SD: 250 mL 186 mg ACN             | HIIE: 7 series of high-intensity cy- cling lasting 60 s and a workload corresponding to 100% of the peak power obtained in the maximum incremental test with a 75 s active recovery interval (30 W), 17 min | Before and at 0, 30, and 60 min post- HIIE                                                                           | <b>I:</b> ↑ IL-10 and cortisol<br>↓ TNF-α<br>→ IL-1-β, IL-6, and IL-8<br><b>P:</b> ↑ rPPO <sub>spint</sub>                                                                                                                                                                                                                                                                                                                          |
| Montanari et al. (2020) [43]—United Kingdom            | 13 M, trained<br>VO <sub>2max</sub> = 55.3 ± 6.7 mL. kg. min                     | 7 days                   | Blackcurrant, extract             | SD: 1–2 cap- sules 105–210 mg ACN | Incremental in- tensity cycling test followed by 10 min cycling at 65% VO <sub>2max</sub> end- ing with the 16.1 km time trial ~28 min                                                                      | During the last mi- nute of every stage in incremental cy- cling test and after completion of 16.1 km                | <b>P:</b> → Lactate, VO <sub>2</sub> , VCO <sub>2</sub> , V <sub>E</sub> , and RER<br>A time difference was observed between day 1 (1701 ± 163 s) and day 4 (1682 ± 162 s) for 210 mg ACN, with an incre- ment in average speed and time to complete the 16.1 km time trial. However, there was no difference between the other days and between conditions<br><b>SO:</b> → Carbohydrate and fat oxidation rates<br><b>CM:</b> → HR |
| Montanari et al. (2021) [44]—United Kingdom            | 13 M, trained<br>VO <sub>2max</sub> = 55.3 ± 6.7 mL. kg. min                     | 7 days                   | Blackcurrant, extract             | SD: 1–2 cap- sules 105–210 mg ACN | Incremental in- tensity cycling test followed by 10 min cycling at 65% VO <sub>2max</sub> end- ing with the 16.1 km time trial ~28 min                                                                      | At the end of each stage                                                                                             | <b>CM:</b> → SBP, DBP, MAP, HR, SV, CO, and TPR at rest<br>A significant effect for time was observed for CO, SV, and TPR during submaximal exercise on day 7. However, these changes were trivial and fell within the coeffi- cient of variation of the study design                                                                                                                                                               |
| Morgan; Bar- ton; Bowtell (2019) [29]—United King- dom | 8 M, trained<br>VO <sub>2max</sub> = 62.3 ± 10.1 mL. kg. min                     | 7 days                   | Cherry, pow- dered freeze- dried  | MD: 6 cap- sules 257 mg ACN       | 10 min of steady state cycling at ~65% VO <sub>2peak</sub> fol- lowed by a 15 km time trial, ~36 min                                                                                                        | Baseline, post steady-state exercise, and post time trial                                                            | <b>MO:</b> ↑ TOI<br><b>P:</b> ↓ Total time to com- plete the 15 km time trial<br>↑ Lactate<br>→ VO <sub>2</sub> and RER                                                                                                                                                                                                                                                                                                             |
| Murphy, Cook; Wil- lems (2017)                         | 10 M, trained                                                                    | 7 days                   | Blackcurrant, extract             | SD: 1 capsule 105 mg ACN          | 2 × 4 km time tri- als separated by 10 min of active recovery at the                                                                                                                                        | Immediately after each trial and 8 min into recovery be- tween the trials                                            | <b>P:</b> ↓ The total time of the two 4 km cycling trials by 0.82%<br>→ Lactate                                                                                                                                                                                                                                                                                                                                                     |

|                                            |                                                                                 |         |                       |                                |                                                                                                                                                                                     |                                                                                                                                                                                                                    |                                                                                                                                                                                   |
|--------------------------------------------|---------------------------------------------------------------------------------|---------|-----------------------|--------------------------------|-------------------------------------------------------------------------------------------------------------------------------------------------------------------------------------|--------------------------------------------------------------------------------------------------------------------------------------------------------------------------------------------------------------------|-----------------------------------------------------------------------------------------------------------------------------------------------------------------------------------|
| [30]—United Kingdom                        | VO <sub>2max</sub> = 55.0 ± 7.0 mL. kg. min                                     |         |                       |                                | selected auto cycling intensity, ~6 min                                                                                                                                             |                                                                                                                                                                                                                    |                                                                                                                                                                                   |
| Strauss et al. (2018) [25]—United Kingdom  | 16 F, untrained<br>VO <sub>2max</sub> = 43.7 ± 1.1 mL. kg. min                  | 7 days  | Blackcurrant, extract | SD: 2 capsules<br>210 mg ACN   | 120 min cycling at 65% VO <sub>2max</sub>                                                                                                                                           | Baseline and at 15 min intervals throughout the exercise                                                                                                                                                           | SO: ↑ Fat oxidation over time during the cycling bout<br>↑ NEFA and glycerol pre-exercise the cycling bout<br>Tendency to ↓ carbohydrate oxidation                                |
| Terrazas et al. (2019) [15]—Brazil         | 10 M, recreationally trained<br>** VO <sub>2max</sub> = 45.5 ± 3.5 mL. kg. min  | 15 days | Açaí, pulp            | SD: 400 g<br>284.4 mg ACN      | Incremental test started at 150 W, with increments of 25 W every 2 min until voluntary exhaustion, protocol duration not reported                                                   | At the beginning and end of each trial, before performing the incremental test                                                                                                                                     | OS: ↓ MDA<br>↑ TEAC<br>→ DNA damage<br>P: ↓ Lactate ↑ ATi                                                                                                                         |
| Torregrosa-García et al. (2019) [38]—Spain | 26 M, recreationally trained<br>VO <sub>2max</sub> = 54.4 ± 9.0 mL. kg. min     | 15 days | Pomegranate, extract  | SD: 2 capsules<br>Not reported | Square-wave endurance test followed by an incremental stress test until exhaustion and a subsequent eccentric exercise ~105 min                                                     | At the end of the test (lactate) and 10 min before the first isokinetic test and subsequently upon each strength assessment completion (2, 24, 48, and 72 h later) for muscular damage and inflammation biomarkers | I: ↓ CRP<br>Muscle damage: ↓ CK<br>Fatigue: ↓ % work fatigue<br>P: ↑ TTE and the time to reach VT2<br>→ VO <sub>2max</sub> , VO <sub>2</sub> at VT2, lactate RPE, and peak torque |
| Willems et al. (2015) [42]—United Kingdom  | 8 M, 5 F, recreationally trained<br>VO <sub>2max</sub> = 49.1 ± 6.2 mL. kg. min | 7 days  | Blackcurrant, powder  | SD: 6 g<br>138.6 mg ACN        | 2 incremental cycling protocols with the recording of physiological and cardiovascular responses, protocol duration not reported                                                    | Immediately after each stage and 3 min after voluntary exhaustion during the maximum oxygen uptake test                                                                                                            | P: ↓ Lactate<br>→ Power and maximum values of oxygen uptake. However, maximum oxygen uptake with blackcurrant powder was obtained with lactate values 14% lower                   |
| Willems et al. (2019) [41]—United Kingdom  | 11 M, recreationally trained<br>VO <sub>2max</sub> = 47.0 ± 7.0 mL. kg. min     | 7 days  | Blackcurrant, extract | SD: 2 capsules<br>210 mg ACN   | Steady state cycling test (3 × 10 min at 45%, 55%, and 65% VO <sub>2max</sub> ) followed by a 16.1 km time trial at a simulated altitude of ~2500 m (~15% O <sub>2</sub> ), ~58 min | In the last 30 s of each stage of incremental cycling test for oxygen–cycling power relationship and 3 min after the end of the incremental cycling test for maximum oxygen uptake                                 | P: → 16.1 km cycling time trial, lactate, and RER<br>SO: → substrate oxidation during steady state cycling at 45%, 55%, and 65% VO <sub>2max</sub><br>CM: → Blood glucose and HR  |

\* Classification of training status according to De Pauw et al. (2013) [36]. \*\* Estimated VO<sub>2max</sub> according to Santilla et al. (2013) [37].
